ventilation to target a predefined range of respiratory effort. *Crit Care Med* 2013; 41:2125–32

36. Coisel Y, Chanques G, Jung B, Constantin JM, Capdevila X, Matecki S, Grasso S, Jaber S: Neurally adjusted ventilatory assist in critically ill postoperative patients: A crossover randomized study. *ANESTHESIOLOGY* 2010; 113:925–35
37. Di Mussi R, Spadaro S, Mirabella L, Volta CA, Serio G, Staffieri F, Dambrosio M, Cinnella G, Bruno F, Grasso S: Impact of prolonged assisted ventilation on diaphragmatic efficiency: NAVA versus PSV. *Crit Care* 2016; 20:1
38. Colombo D, Cammarota G, Bergamaschi V, De Lucia M, Corte FD, Navalesi P: Physiologic response to varying levels of pressure support and neurally adjusted ventilatory assist in patients with acute respiratory failure. *Intensive Care Med* 2008; 34:2010–8
39. Wang S, Zhang L, Huang K, Lin Z, Qiao W, Pan S: Predictors of extubation failure in neurocritical patients identified by a systematic review and meta-analysis. *PLoS One* 2014; 9:e112198
40. Tuchscherer D, Z'graggen WJ, Passath C, Takala J, Sinderby C, Brander L: Neurally adjusted ventilatory assist in patients with critical illness-associated polyneuromyopathy. *Intensive Care Med* 2011; 37:1951–61
41. Karagiannidis C, Lubnow M, Philipp A, Riegger GA, Schmid C, Pfeifer M, Mueller T: Autoregulation of ventilation with neurally adjusted ventilatory assist on extracorporeal lung support. *Intensive Care Med* 2010; 36:2038–44

## ANESTHESIOLOGY REFLECTIONS FROM THE WOOD LIBRARY-MUSEUM

### Birth Centennial of Nobel Laureate Skou, an Investigator of Local Anesthetics and the Sodium–Potassium Pump

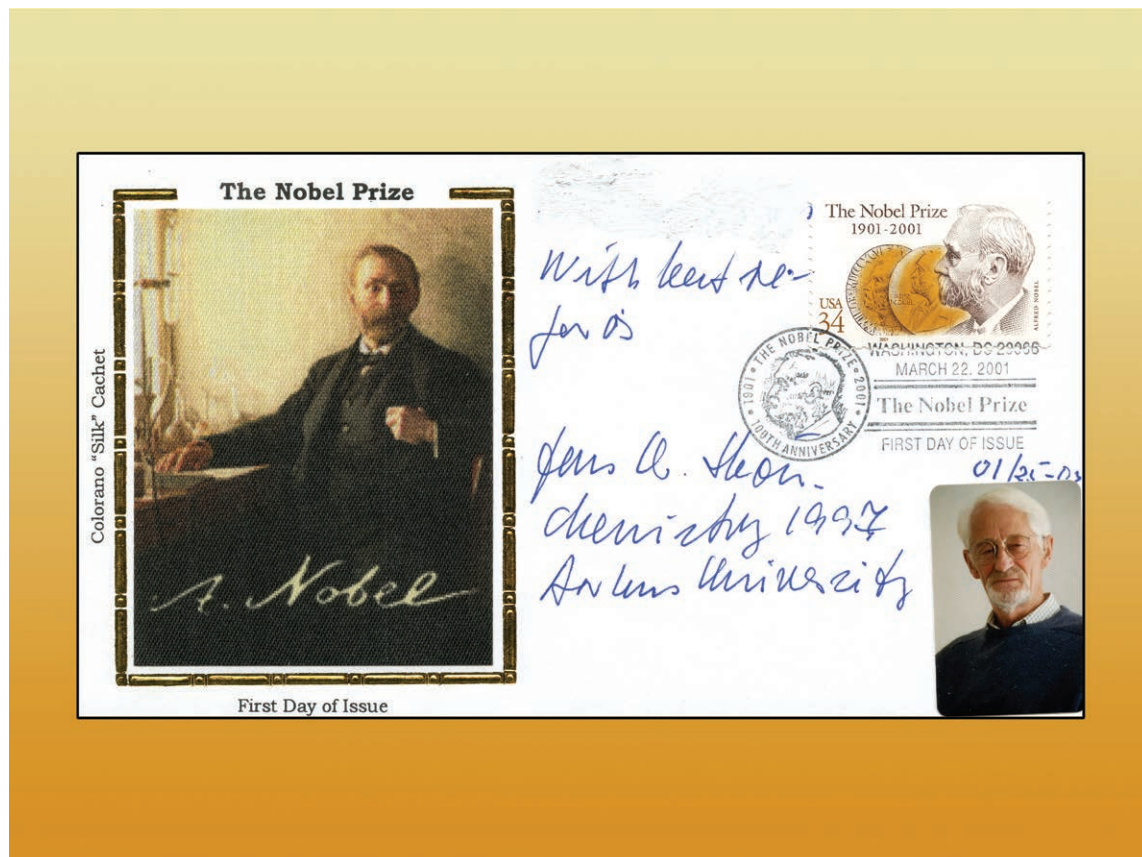

In 1947 a Danish physician–physiologist, Jens Christian Skou (1918 to 2018, *lower right*), began working at the Institute for Medical Physiology at Aarhus University. Although his 1951 doctoral dissertation correlated local anesthetic activity with lipid solubility, Skou eventually investigated the physiology of nerves in shore crabs' legs. In 1957 Skou became the first to discover an ion-transporting enzyme, the sodium–potassium pump. Forty years later, in Stockholm, Sweden, Skou was awarded his half of the 1997 Nobel Prize in Chemistry. This month, October of 2018, marks the birth centennial of Jens Christian Skou, whose “curiosity-based research” led him from local anesthetics to worldwide fame. (Copyright © the American Society of Anesthesiologists' Wood Library-Museum of Anesthesiology.)

George S. Bause, M.D., M.P.H., *Honorary Curator and Laureate of the History of Anesthesia, Wood Library-Museum of Anesthesiology, Schaumburg, Illinois, and Clinical Associate Professor, Case Western Reserve University, Cleveland, Ohio. UJYC@aol.com.*
